# Supplementary material for: Influenza A Infection Stimulates RIG-I and Enhances Effector Function of Primary Human NK Cells
Source: Preprints.org preprint supplement (doi:10.20944/preprints202306.1827.v1), 2023-06-26
Supplement: Supplementary file 1 [file supplementary]

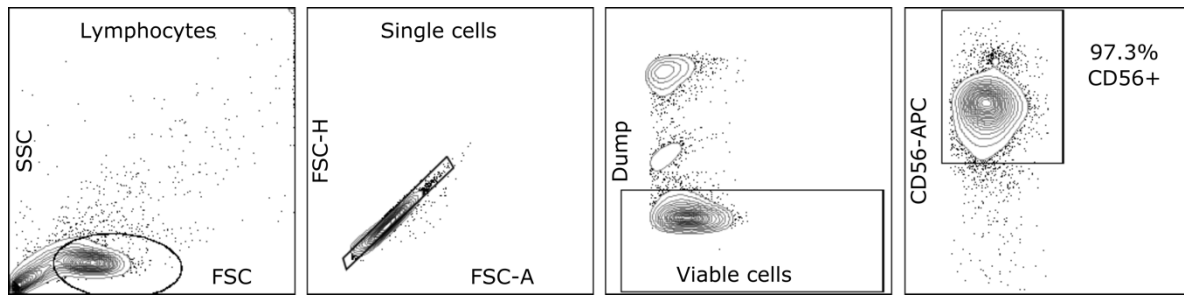

**Supplementary Figure 1. Gating strategy and NK purity post-enrichment.** Representative flow cytometry plots of PBMCs. The lymphocytes were gated using the forward and side scatter plot and by excluding doublets, dead cells and CD3<sup>+</sup> cells. The NK cells were identified as CD56<sup>+</sup> CD3<sup>-</sup> cells.

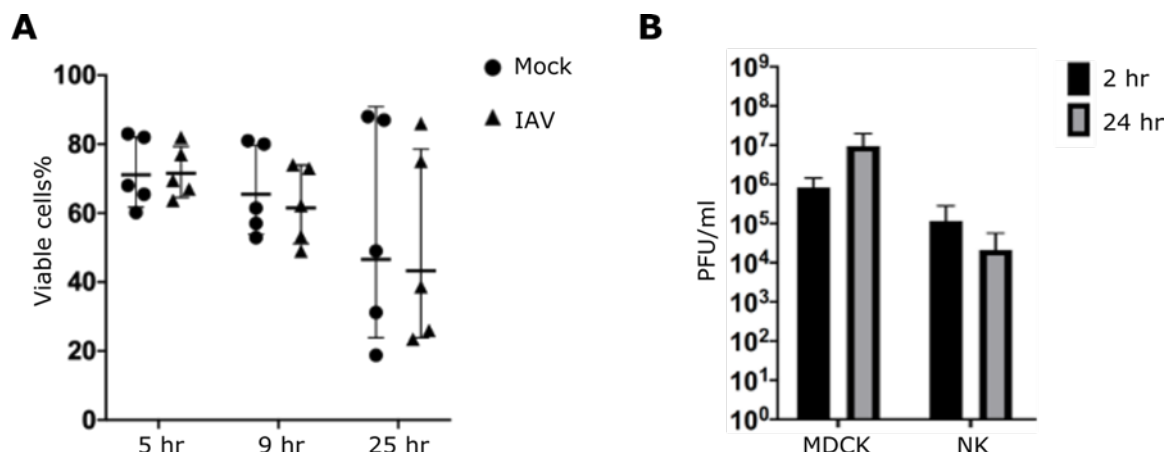

**Supplementary Figure 2. Cell viability and live virus in the supernatant after incubation with IAV**

**A)** Graph represents the viability of mock-treated and IAV-infected NK cells (10 MOI) at 5, 9, and 25 hrs post infection. Each symbol represents a unique sample. Data are shown as mean  $\pm$  SD, n=5. **B)** Bar graph of viral titer (PFU/ml), measured by plaque assay, from cell-free supernatants of NK cells and MDCK cell cultures at 2- and 24-hrs post-incubation with IAV. Bars show mean  $\pm$  SEM, n=3.

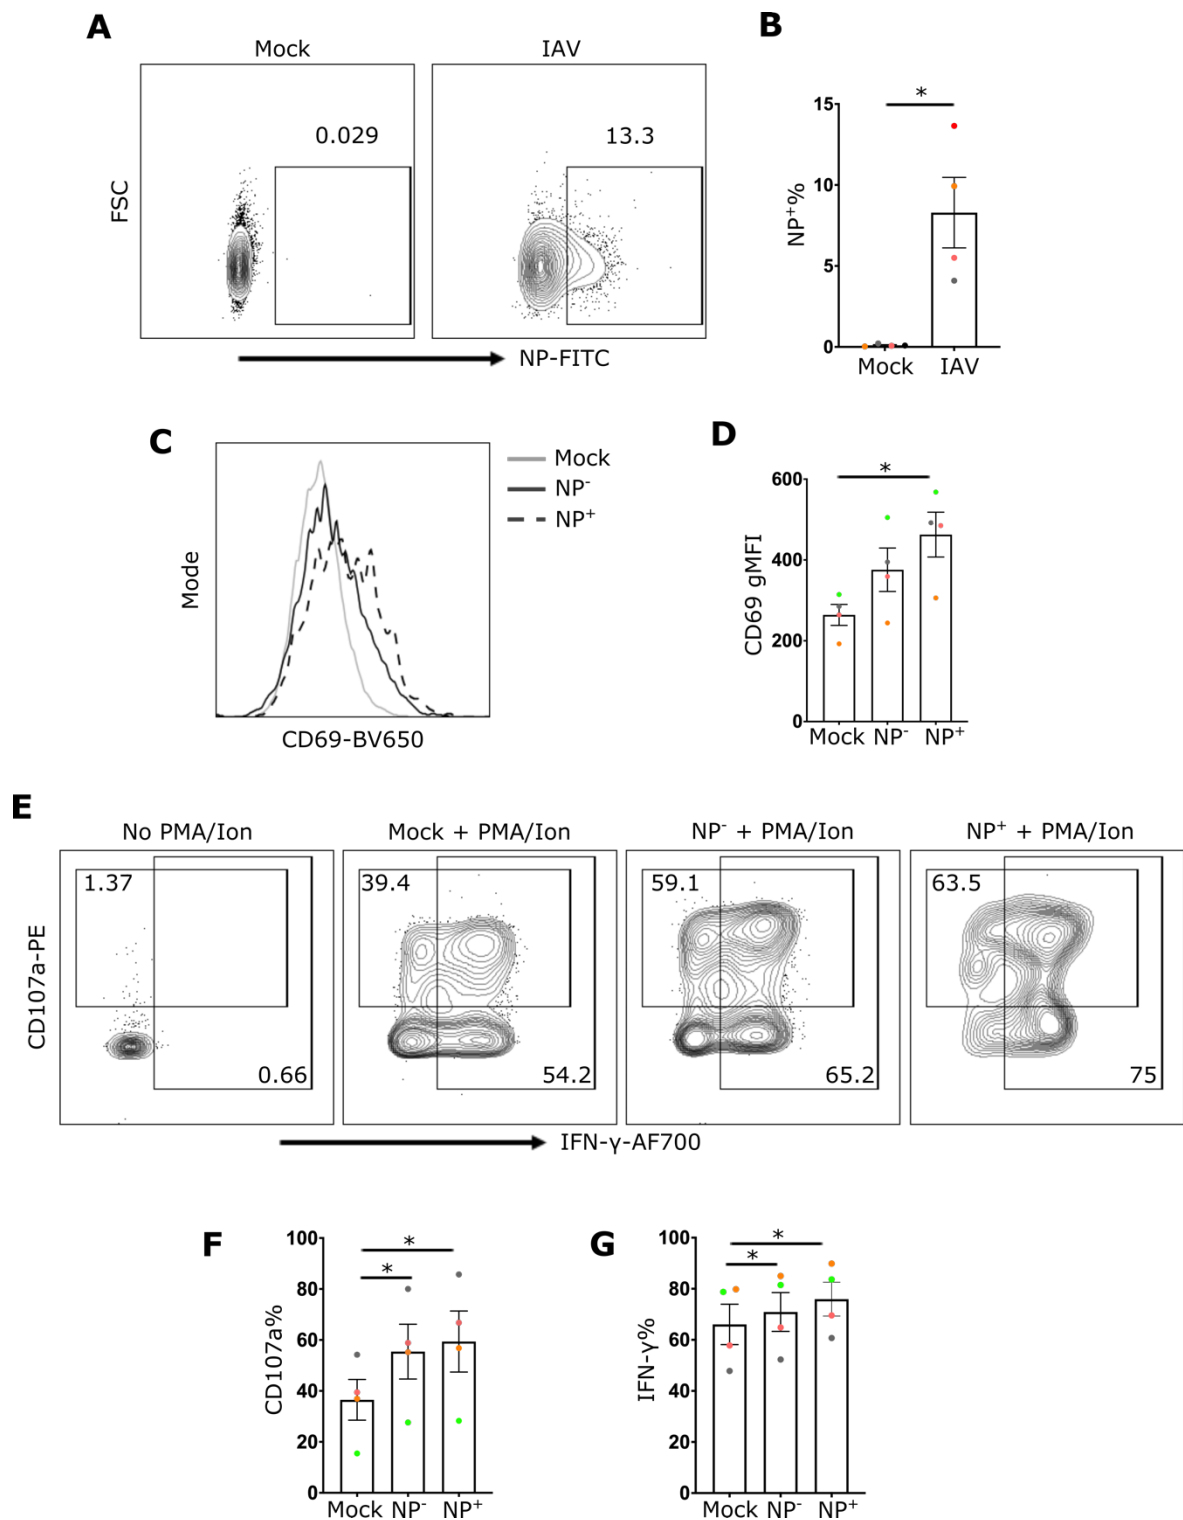

**Supplementary Figure 3. IAV infection of NK cells enhances their activation by PMA/Ionomycin**

**A)** Representative NK cell flow cytometry plots and **B)** quantification of NP<sup>+</sup> NK cells at 8 hrs after media alone incubation (Mock) or incubation with IAV (n=5). **C)** Representative histogram of CD69 gMFI for mock-treated, NP<sup>-</sup> and NP<sup>+</sup> NK cells and **D)** quantification of

CD69 gMFI (n=4). **E**) Representative NK cell flow cytometry plots from media alone (Mock), NP<sup>-</sup> and NP<sup>+</sup> NK cells stimulated with PMA/Ionomycin and **F**) quantification of CD107a<sup>+</sup> cells and **G**) IFN- $\gamma$ <sup>+</sup> cells from these cultures. Each symbol represents an individual donor (color is representative of paired samples). Bars show mean  $\pm$  SEM. Statistical analysis was performed using paired t-test (\*p < 0.05, \*\*p < 0.01).

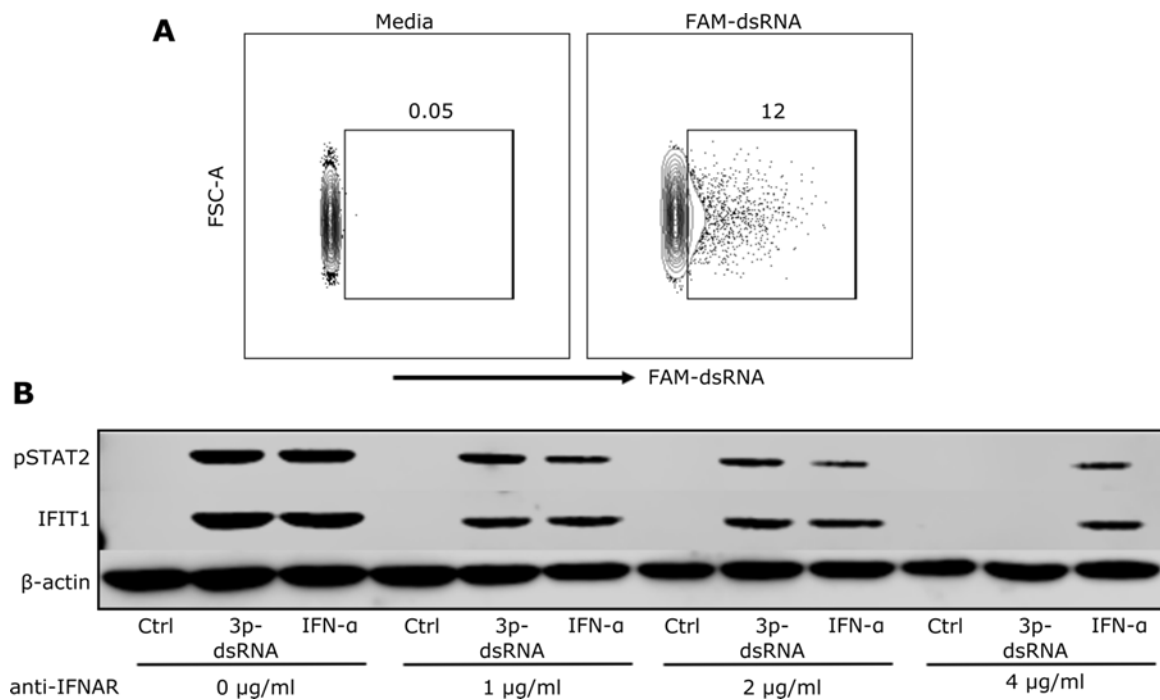

#### Supplementary Figure 4. 3p-dsRNA induces IFN-I secretion and stimulates IFNAR-dependent IFIT1 induction

**A)** NK cell flow cytometry plots after overnight incubation in media alone or after treatment with FAM-labelled dsRNA. **B)** Western blot of NK cells for phosphorylated STAT2 (pSTAT2) and IFIT1 proteins without, or pre-treated with anti-IFNAR $\alpha$  antibodies (1, 2, or 4  $\mu$ g/ml) for 1 hr before overnight incubation with media alone, 3pdsRNA, or IFN- $\alpha$ .

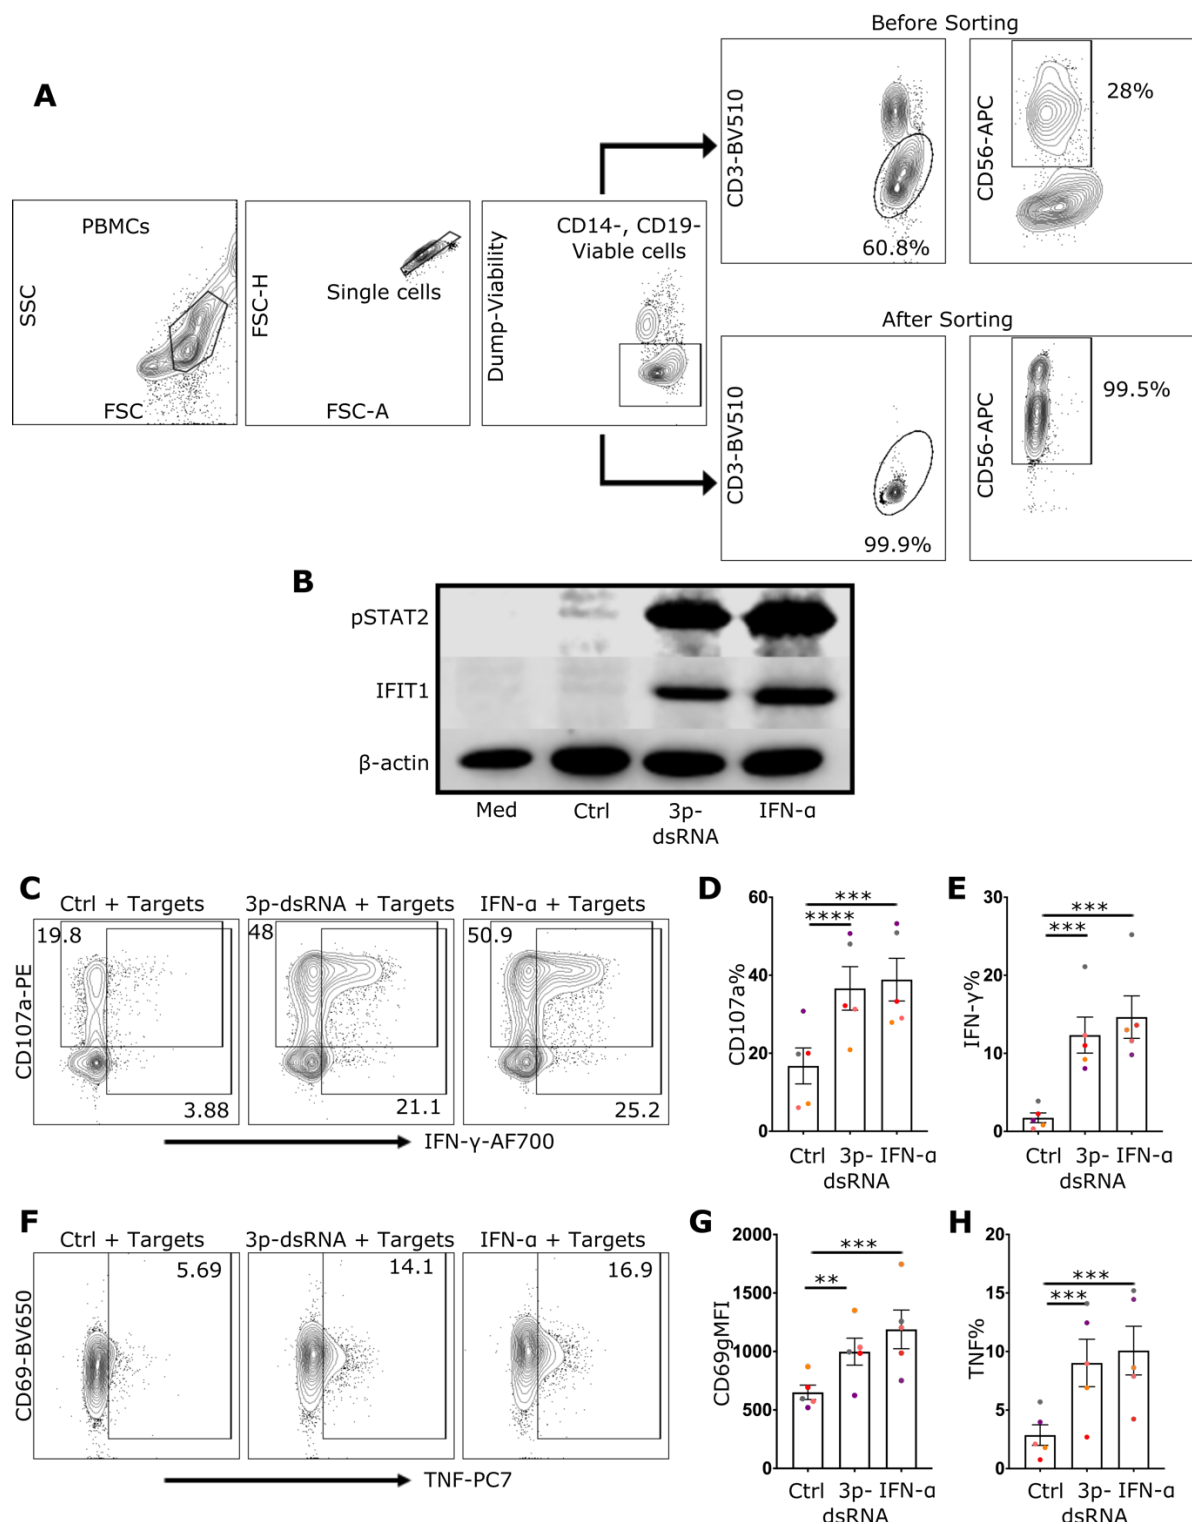

**Supplementary Figure 5. Sorted NK cells reproduce results from cultures obtained from NK negative selection kits**

**A)** Representative flow cytometry plots showing the gating strategy for cell sorting and the purity of NK cells before and after sorting. **B)** Western blot from sorted NK cells treated as labelled **C)** Representative sorted NK cell flow cytometry plots showing CD107 and IFN- $\gamma$  staining, **D)** the percentage (%) of CD107a- or **E)** IFN- $\gamma$ -positive cells (n=5), in the presence of 3p-ssRNA (Ctrl), 3p-dsRNA or IFN- $\alpha$ . Each symbol represents an individual donor (color is representative of paired samples). Bars show mean  $\pm$  SEM. Statistical analysis was

performed using repeated measures one-way ANOVA with Dunnett's correction (\* $p < 0.05$ , \*\* $p < 0.01$ , \*\*\* $p < 0.001$ , and \*\*\*\* $p < 0.0001$ ).

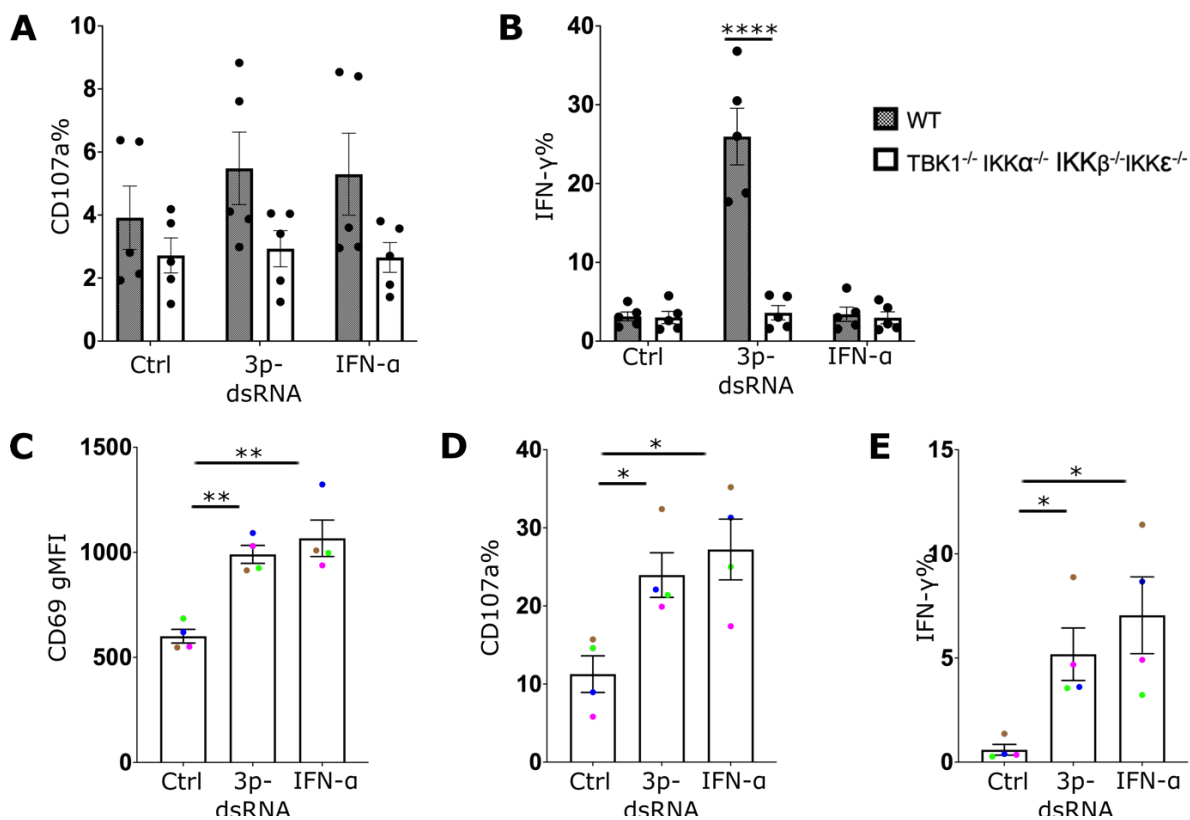

**Supplementary Figure 6. RIG-I stimulation enhances NK cell function towards TBK1<sup>-/-</sup> IKKα<sup>-/-</sup> IKKβ<sup>-/-</sup> IKKε<sup>-/-</sup> THP1 targets**

**A)** The percentage (%) of CD107a and **B)** IFN-γ positive NK cells pre-incubated (for 4 hrs) with 3p-ssRNA (Ctrl), 3p-dsRNA or IFN-α followed by co-culture with WT THP1 cells or TBK1<sup>-/-</sup> IKKα<sup>-/-</sup> IKKβ<sup>-/-</sup> IKKε<sup>-/-</sup> THP1 cells (n=5). **C)** The CD69 gMFI, **D)** % CD107a and **E)** % IFN-γ positive NK cells pre-incubated overnight with 3p-ssRNA (Ctrl), 3p-dsRNA or IFN-α, followed by co-culturing with TBK1<sup>-/-</sup> IKKα<sup>-/-</sup> IKKβ<sup>-/-</sup> IKKε<sup>-/-</sup> THP1 cells (n=4). Each symbol represents an individual donor (color is representative of paired samples). Bars show mean ± SEM. Statistical analysis was performed using two-way ANOVA with Bonferroni's correction for multiple comparisons and repeated measures one-way ANOVA with Dunnett's correction for more than two groups (\* $p < 0.05$ , \*\* $p < 0.01$ , \*\*\* $p < 0.001$ , and \*\*\*\* $p < 0.0001$ ).
